# Supplementary material for: Cross-cultural adaptation and validation of the Italian version of the Hip disability and Osteoarthritis Outcome Score (HOOS)
Source: PubMed Central journal article supplement (PMC5987663; doi:10.1186/s12955-018-0935-6), 2018-06-04
Supplement: 12955_2018_935_MOESM1_ESM.pdf [file 12955_2018_935_MOESM1_ESM.pdf]

**QUESTIONARIO HOOS PER PAZIENTI CON PATOLOGIE DELL'ANCA**

Data: \_\_\_\_/\_\_\_\_/\_\_\_\_ Data di nascita: \_\_\_\_/\_\_\_\_/\_\_\_\_

Nome: \_\_\_\_\_

**ISTRUZIONI**

Questo questionario è stato predisposto per conoscere il Suo parere sullo stato della Sua anca. Queste informazioni possono aiutarci a comprendere cosa Lei pensa del Suo disturbo e quanto Lei sia in grado di compiere le comuni attività della vita quotidiana.

Risponda a ciascuna domanda, mettendo una crocetta nella casella corrispondente (solo una risposta per ciascuna domanda). Se nessuna delle risposte dovesse sembrarLe appropriata, scelga quella che più si avvicina alla Sua situazione.

**Sintomi**

Le domande che seguono riguardano i sintomi e le difficoltà che ha provato all'anca **nel corso dell'ultima settimana**.

S1. Scrosci, scatti o altri tipi di rumore

Mai

Raramente

Qualche volta

Spesso

Sempre

S2. Difficoltà nel divaricare al massimo le gambe

Nessuna

Lieve

Moderata

Grave

Estrema

S3. Difficoltà a fare passi lunghi mentre cammina

Nessuna

Lieve

Moderata

Grave

Estrema

**Rigidità**

Le domande che seguono riguardano il grado di rigidità che ha provato all'anca **nel corso dell'ultima settimana**. La rigidità è una sensazione di limitazione o minore facilità nel muovere l'anca.

S4. Quanto intensa è la rigidità della sua anca subito dopo il risveglio al mattino?

Nessuna

Lieve

Moderata

Grave

Estrema

S5. Quanto intensa è la rigidità della sua anca dopo essere stato seduto, disteso o aver riposato nel corso della giornata?

Nessuna

Lieve

Moderata

Grave

Estrema

## Dolore

P1. Quanto frequentemente le fa male l'anca?

Mai

Mensilmente

Settimanalmente

Quotidianamente

Sempre

Quale è stata l'intensità del dolore che ha provato all'anca **nell'ultima settimana** durante le seguenti attività?

P2. Estendere completamente l'anca

Nessuna

Lieve

Moderata

Grave

Estrema

P3. Flettere completamente l'anca

Nessuna

Lieve

Moderata

Grave

Estrema

P4. Camminare su una superficie piana

Nessuna

Lieve

Moderata

Grave

Estrema

P5. Salire o scendere le scale

Nessuna

Lieve

Moderata

Grave

Estrema

P6. Di notte, a letto

Nessuna

Lieve

Moderata

Grave

Estrema

P7. Stare seduto o sdraiato

Nessuna

Lieve

Moderata

Grave

Estrema

P8. Stare in piedi in posizione eretta

Nessuna

Lieve

Moderata

Grave

Estrema

P9. Camminare su una superficie rigida (asfalto, cemento, ecc.)

Nessuna

Lieve

Moderata

Grave

Estrema

P10. Camminare su una superficie irregolare

Nessuna

Lieve

Moderata

Grave

Estrema

## Funzione, attività della vita quotidiana

Le domande che seguono riguardano le sue capacità funzionali, in particolare la sua abilità nel muoversi e prendersi cura di sé. Per ciascuna delle seguenti attività indichi per favore il grado di difficoltà provato **nell'ultima settimana** a causa dei problemi all'anca.

A1. Scendere le scale

Nessuna

Lieve

Moderata

Grave

Estrema

A2. Salire le scale

Nessuna

Lieve

Moderata

Grave

Estrema

A3. Alzarsi da seduto

Nessuna

Lieve

Moderata

Grave

Estrema

A4. Stare in piedi

Nessuna

Lieve

Moderata

Grave

Estrema

A5. Piegarsi verso il pavimento/raccogliere un oggetto

Nessuna

Lieve

Moderata

Grave

Estrema

A6. Camminare su una superficie piana

Nessuna

Lieve

Moderata

Grave

Estrema

A7. Salire e/o scendere da un'automobile

Nessuna

Lieve

Moderata

Grave

Estrema

A8. Andare a fare spese

Nessuna

Lieve

Moderata

Grave

Estrema

A9. Mettersi i calzini o le calze

Nessuna

Lieve

Moderata

Grave

Estrema

A10. Alzarsi dal letto

Nessuna

Lieve

Moderata

Grave

Estrema

A11. Togliere i calzini o le calze

Nessuna

Lieve

Moderata

Grave

Estrema

|                                                                                       |                          |                          |                          |                          |                          |
|---------------------------------------------------------------------------------------|--------------------------|--------------------------|--------------------------|--------------------------|--------------------------|
| A12. Stare sdraiato a letto (girarsi tenendo ferma l'anca)                            | Nessuna                  | Lieve                    | Moderata                 | Grave                    | Estrema                  |
|                                                                                       | <input type="checkbox"/> | <input type="checkbox"/> | <input type="checkbox"/> | <input type="checkbox"/> | <input type="checkbox"/> |
| A13. Entrare e/o uscire dalla vasca da bagno/doccia                                   | Nessuna                  | Lieve                    | Moderata                 | Grave                    | Estrema                  |
|                                                                                       | <input type="checkbox"/> | <input type="checkbox"/> | <input type="checkbox"/> | <input type="checkbox"/> | <input type="checkbox"/> |
| A14. Stare seduto                                                                     | Nessuna                  | Lieve                    | Moderata                 | Grave                    | Estrema                  |
|                                                                                       | <input type="checkbox"/> | <input type="checkbox"/> | <input type="checkbox"/> | <input type="checkbox"/> | <input type="checkbox"/> |
| A15. Sedersi e/o alzarsi dal water                                                    | Nessuna                  | Lieve                    | Moderata                 | Grave                    | Estrema                  |
|                                                                                       | <input type="checkbox"/> | <input type="checkbox"/> | <input type="checkbox"/> | <input type="checkbox"/> | <input type="checkbox"/> |
| A16. Fare lavori domestici pesanti (spostare scatole pesanti, lavare pavimenti, ecc.) | Nessuna                  | Lieve                    | Moderata                 | Grave                    | Estrema                  |
|                                                                                       | <input type="checkbox"/> | <input type="checkbox"/> | <input type="checkbox"/> | <input type="checkbox"/> | <input type="checkbox"/> |
| A17. Fare lavori domestici leggeri (cucinare, spolverare, ecc.)                       | Nessuna                  | Lieve                    | Moderata                 | Grave                    | Estrema                  |
|                                                                                       | <input type="checkbox"/> | <input type="checkbox"/> | <input type="checkbox"/> | <input type="checkbox"/> | <input type="checkbox"/> |

### Funzione fisica, attività sportive e del tempo libero

Le domande che seguono riguardano le sue capacità funzionali quando svolge attività che richiedono un impegno maggiore. Faccia riferimento al grado di difficoltà provato a causa dell'anca **nell'ultima settimana**.

|                                             |                          |                          |                          |                          |                          |
|---------------------------------------------|--------------------------|--------------------------|--------------------------|--------------------------|--------------------------|
| SP1. Accovacciarsi                          | Nessuna                  | Lieve                    | Moderata                 | Grave                    | Estrema                  |
|                                             | <input type="checkbox"/> | <input type="checkbox"/> | <input type="checkbox"/> | <input type="checkbox"/> | <input type="checkbox"/> |
| SP2. Correre                                | Nessuna                  | Lieve                    | Moderata                 | Grave                    | Estrema                  |
|                                             | <input type="checkbox"/> | <input type="checkbox"/> | <input type="checkbox"/> | <input type="checkbox"/> | <input type="checkbox"/> |
| SP3. Girarsi facendo perno sulla gamba      | Nessuna                  | Lieve                    | Moderata                 | Grave                    | Estrema                  |
|                                             | <input type="checkbox"/> | <input type="checkbox"/> | <input type="checkbox"/> | <input type="checkbox"/> | <input type="checkbox"/> |
| SP4. Camminare su una superficie irregolare | Nessuna                  | Lieve                    | Moderata                 | Grave                    | Estrema                  |
|                                             | <input type="checkbox"/> | <input type="checkbox"/> | <input type="checkbox"/> | <input type="checkbox"/> | <input type="checkbox"/> |

## Qualità della vita

Q1. Con quale frequenza si rende conto del suo problema all'anca?

Mai                      Mensilmente                      Settimanalmente                      Quotidianamente                      Sempre  
                                                                                       

Q2. Ha modificato il Suo stile di vita per evitare attività potenzialmente dannose per la Sua anca?

Per niente                      Poco                      In parte                      Molto                      Moltissimo  
                                                                                       

Q3. Quanto è preoccupato dalla mancanza di sicurezza della sua anca?

Per niente                      Poco                      In parte                      Molto                      Moltissimo  
                                                                                       

Q4. In generale, quanto è in difficoltà a causa della sua anca?

Per niente                      Poco                      In parte                      Molto                      Moltissimo  
                                                                                       

**La ringraziamo molto per aver risposto  
a tutte le domande del questionario!**
